# Supplementary material for: Fostering pre-service teachers' assessment skills in a video simulation
Source: Atypon-hosted journal article supplement (doi:10.1024/1010-0652/a000362), 2023-06-12
Supplement: 1010-0652_a000362_esm1.pdf [file 1010-0652_a000362_esm1.pdf]

ESM 1. Questionnaire instruments.

| <b>Construct</b>         | <b>Adapted from</b>                                    | <b># Items,<br/>Range</b> | <b>Example Item</b>                                                    | <b><math>\alpha_{\text{Cronbach}}</math></b> |
|--------------------------|--------------------------------------------------------|---------------------------|------------------------------------------------------------------------|----------------------------------------------|
| <b>SEp</b>               | Rheinberg et al.<br>(2001)                             | 4 Items,<br>1 to 7        | I think everyone is able<br>to assess adequately.                      | pre: .75,<br>post: .74                       |
| <b>UV</b>                | Wigfield (1994),<br>Canning and<br>Harackiewicz (2015) | 8 Items,<br>1 to 5        | Being able to assess<br>adequately is important<br>for me.             | pre: .89,<br>post: .88                       |
| <b>Extraneous<br/>CL</b> | Klepsch and Seufert<br>(2021)                          | 3 Items,<br>1 to 7        | In this task, it is<br>laborious to find the<br>important information. | pre: .68,<br>post: .78                       |
| <b>Intrinsic<br/>CL</b>  | Klepsch and Seufert<br>(2021)                          | 2 Items,<br>1 to 7        | The task is very complex.                                              | pre: .77,<br>post: .76                       |
