# Supplementary material for: Fostering pre-service teachers' assessment skills in a video simulation
Source: Atypon-hosted journal article supplement (doi:10.1024/1010-0652/a000362), 2023-06-12
Supplement: 1010-0652_a000362_esm2.pdf [file 1010-0652_a000362_esm2.pdf]

## ESM 2

*Disclaimer:* The following images show key elements of the simulation (in German). Note that these images may allow a first impression of the simulation, but may be limited in depicting, for example, the interactivity of the simulation. See references in the main manuscript for more details.

### Step 1: Introduction and Familiarisation

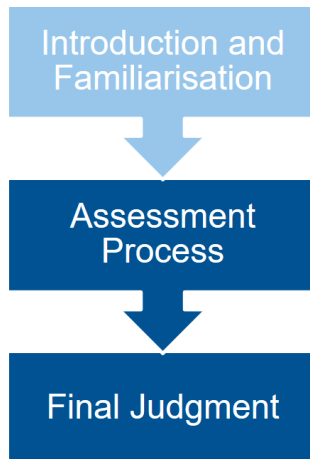

Die Klasse befindet sich gerade im Themengebiet **M7 5 Kongruenz, besondere Dreiecke und Dreieckskonstruktionen**.

In den vergangenen Stunden wurden die **Kongruenzsätze** thematisiert, heute sollen diese in einer **Beweisaufgabe** angewendet werden. Die Schüler(innen) sollen dazu in Einzelarbeit die vorliegende Aufgabe bearbeiten.

**Aufgabe 4 Parallelogramme**  
Das Viereck ABCD ist ein Parallelogramm. Wir wissen davon nur, dass die gegenüberliegenden Seiten parallel zueinander sind. Beweise, dass die gegenüberliegenden Seiten jeweils **gleichlang** sind.

**Wechselwinkelsatz**  $\Rightarrow \alpha = \alpha'$  (W)  
**Wechselwinkelsatz**  $\Rightarrow \beta = \beta'$  (W)

Lösungsvideo ansehen:

In the introduction, participants get to know the assessment situation, the assessment task, and the mathematical task the students are working on.

### Step 2: Assessment Process

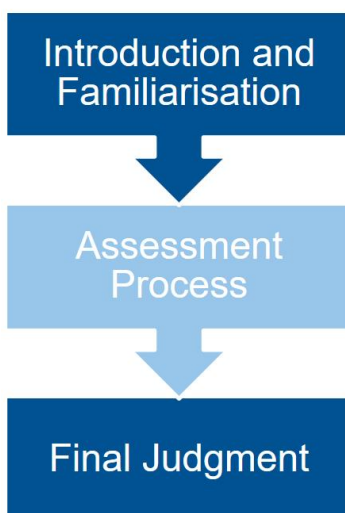

Die Arbeitsphase beginnt ...  
Sehen Sie sich nun ein Gespräch mit beiden Schüler(inne)n an. **Machen Sie sich währenddessen Notizen!**

**Inhalt** Erstellen Sie eine Diagnose für die zwei Schüler(innen) hinsichtlich ihrer Fähigkeiten im **mathematischen Beweisen**.

**Aufbau** Schreiben Sie **schlüssig**, damit Herr Müller individuelle Aufgaben für die folgende Intensivierungsstunde auswählen kann.

Verbleibende Zeit: 19:40 Minuten

Videos starten:  
  
Sie können jedes Video nur einmal ansehen.

Notizen schreiben:  
  
  
Klicken Sie zum Schreiben der Notizen auf das jeweilige Bild.

Ihre Notizen zu Anna  
Schreiben Sie bitte auch in Ihren Notizen schlüssig und verständlich.  
Notes]

Video

Text box for notes

Students to be assessed

In the assessment process, participants gather information on the two students' mathematical argumentation skills by watching video clips.

Step 3: Final Judgment

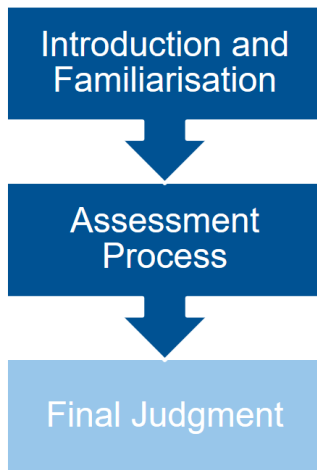

Herr Müller hat noch Zeit, persönlich über Ihren Eindruck der Schüler(innen) zu sprechen.  
 Er stellt Ihnen ein paar Fragen bezüglich Ihrer Beobachtungen zu **Anna**.

Ihre Diagnose zu Anna (zur Erinnerung):  
 XXX FINAL ASSESSMENT XXX



**Wie schätzen Sie Anna ein?**  
 Kreuzen Sie für Ihre Einschätzung das Passende an. Sollten Sie zu einem Aspekt nichts beobachtet haben, dann wählen Sie die Option "keine Angabe".

|                                                                                                | trifft zu             | trifft eher zu        | trifft eher nicht zu  | trifft nicht zu       | keine Angabe          |
|------------------------------------------------------------------------------------------------|-----------------------|-----------------------|-----------------------|-----------------------|-----------------------|
| <b>Anna ...</b>                                                                                |                       |                       |                       |                       |                       |
| ... kennt Eigenschaften zu den grundlegenden Begriffen aus der Figurengeometrie.               | <input type="radio"/> |
| ... hat ausgeprägte prototypische Vorstellungen zu den Begriffen der Figurengeometrie.         | <input type="radio"/> |
| ... kennt Beziehungen und Zusammenhänge zwischen verschiedenen Begriffen der Figurengeometrie. | <input type="radio"/> |
| <b>Anna weiß, ...</b>                                                                          |                       |                       |                       |                       |                       |
| ... welche Art von Argumenten in Beweisen gültig ist.                                          | <input type="radio"/> |
| ... dass ein Beweis bei den Voraussetzungen beginnt und bei der Behauptung endet.              | <input type="radio"/> |
| ... dass Beweise eine lückenlose Folge von Argumenten sind.                                    | <input type="radio"/> |
| <b>Anna kann ...</b>                                                                           |                       |                       |                       |                       |                       |
| ... verschiedene heuristische Strategien zum Lösen von Problemen eigenständig verwenden.       | <input type="radio"/> |
| ... ihr eigenes Vorgehen selbstständig planen, überwachen und gegebenenfalls anpassen.         | <input type="radio"/> |

In the final judgment, participants are asked to rate eight items for each of the two students.
